# Supplementary material for: Bridging clinic and wildlife care with AI-powered pan-species computational pathology
Source: PubMed Central journal article supplement (PMC10133243; doi:10.1038/s41467-023-37879-x), 2023-04-26
Supplement: 41467_2023_37879_MOESM1_ESM.pdf [file 41467_2023_37879_MOESM1_ESM.pdf]

## Supplementary materials

### Bridging clinic and wildlife care with AI-powered pan-species computational pathology

#### Authors

Khalid AbdulJabbar<sup>1,2+</sup>, Simon P. Castillo<sup>1,2+</sup>, Katherine Hughes<sup>3</sup>, Hannah Davidson<sup>4,5</sup>, Amy M. Boddy<sup>6</sup>, Lisa M. Abegglen<sup>7,8</sup>, Lucia Minoli<sup>9</sup>, Selina Iussich<sup>9</sup>, Elizabeth P. Murchison<sup>3</sup>, Trevor A. Graham<sup>1,5</sup>, Simon Spiro<sup>4</sup>, Carlo C. Maley<sup>10</sup>, Luca Aresu<sup>9</sup>, Chiara Palmieri<sup>11</sup>, Yinyin Yuan<sup>1,2\*^</sup>

#### Affiliations

<sup>1</sup>Centre for Evolution and Cancer, The Institute of Cancer Research, London, UK.

<sup>2</sup>Division of Molecular Pathology, The Institute of Cancer Research, London, UK.

<sup>3</sup>Department of Veterinary Medicine, University of Cambridge, Madingley Road, Cambridge, UK.

<sup>4</sup>Zoological Society of London, London, UK.

<sup>5</sup>Centre for Genomics and Computational Biology, Barts Cancer Institute, Queen Mary University of London, Charterhouse Sq, London, UK.

<sup>6</sup>Department of Anthropology, University of California Santa Barbara, Santa Barbara, CA, USA.

<sup>7</sup>Department of Pediatrics and Huntsman Cancer Institute, University of Utah, Salt Lake City, UT, USA.

<sup>8</sup>PEEL Therapeutics, Inc., Salt Lake City, UT, USA.

<sup>9</sup>Department of Veterinary Sciences, University of Turin, 10095 Grugliasco, Italy.

<sup>10</sup> Arizona Cancer Evolution Center, Biodesign Institute and School of Life Sciences, Arizona State University, Tempe, USA.

<sup>11</sup> School of Veterinary Science, The University of Queensland, 4343 Gatton, Queensland, Australia.

\*Authors contributed equally.

\*Correspondence to Yinyin Yuan (yyuan6@mdanderson.org)

^Current affiliation: Department of Translational Molecular Pathology, The University of Texas MD Anderson Cancer Center

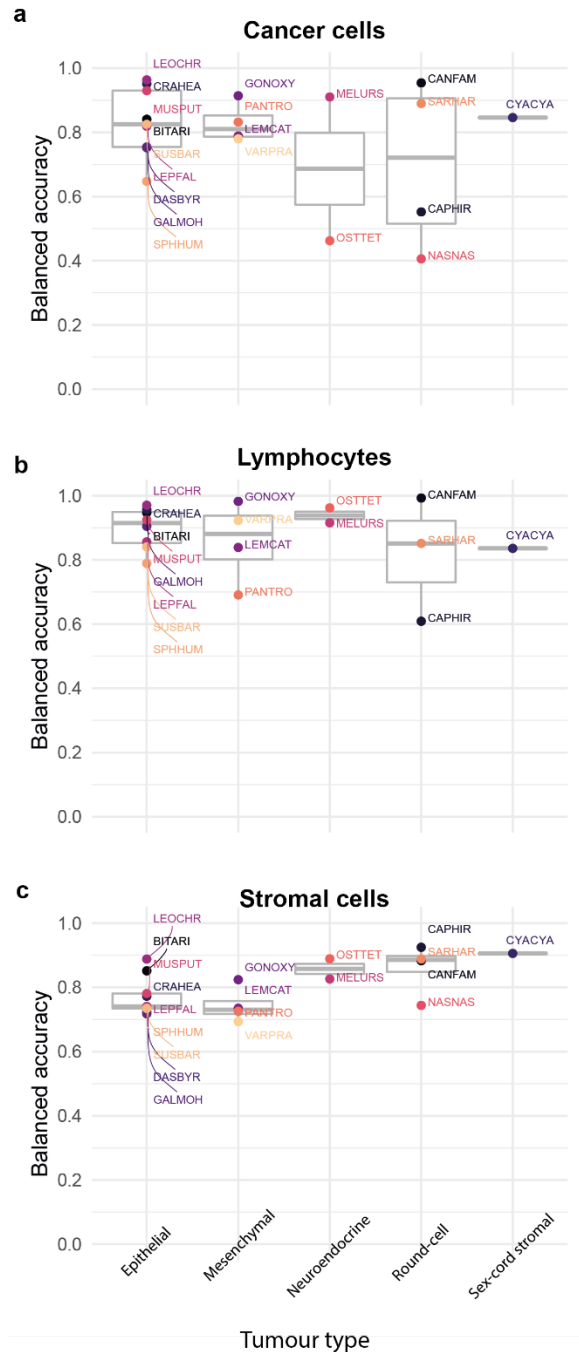

**Supplementary Figure 1 Extended AI single-cell prediction comparison across tumour types.**

Balanced accuracy is computed as the average of sensitivity and specificity for (a) cancer, (b) lymphocytes and (c) stromal cells for all species. Species, n = 20 independent samples, are grouped according to their tumour type and are labelled with their codes, for more species information, see Table 1. Colour-code are for independent samples (one per species). In boxplots, thick horizontal lines indicate the median value, outliers are indicated by the extreme points, the first and third quantiles are represented by the box edges and vertical lines indicate minimum and maximum values.

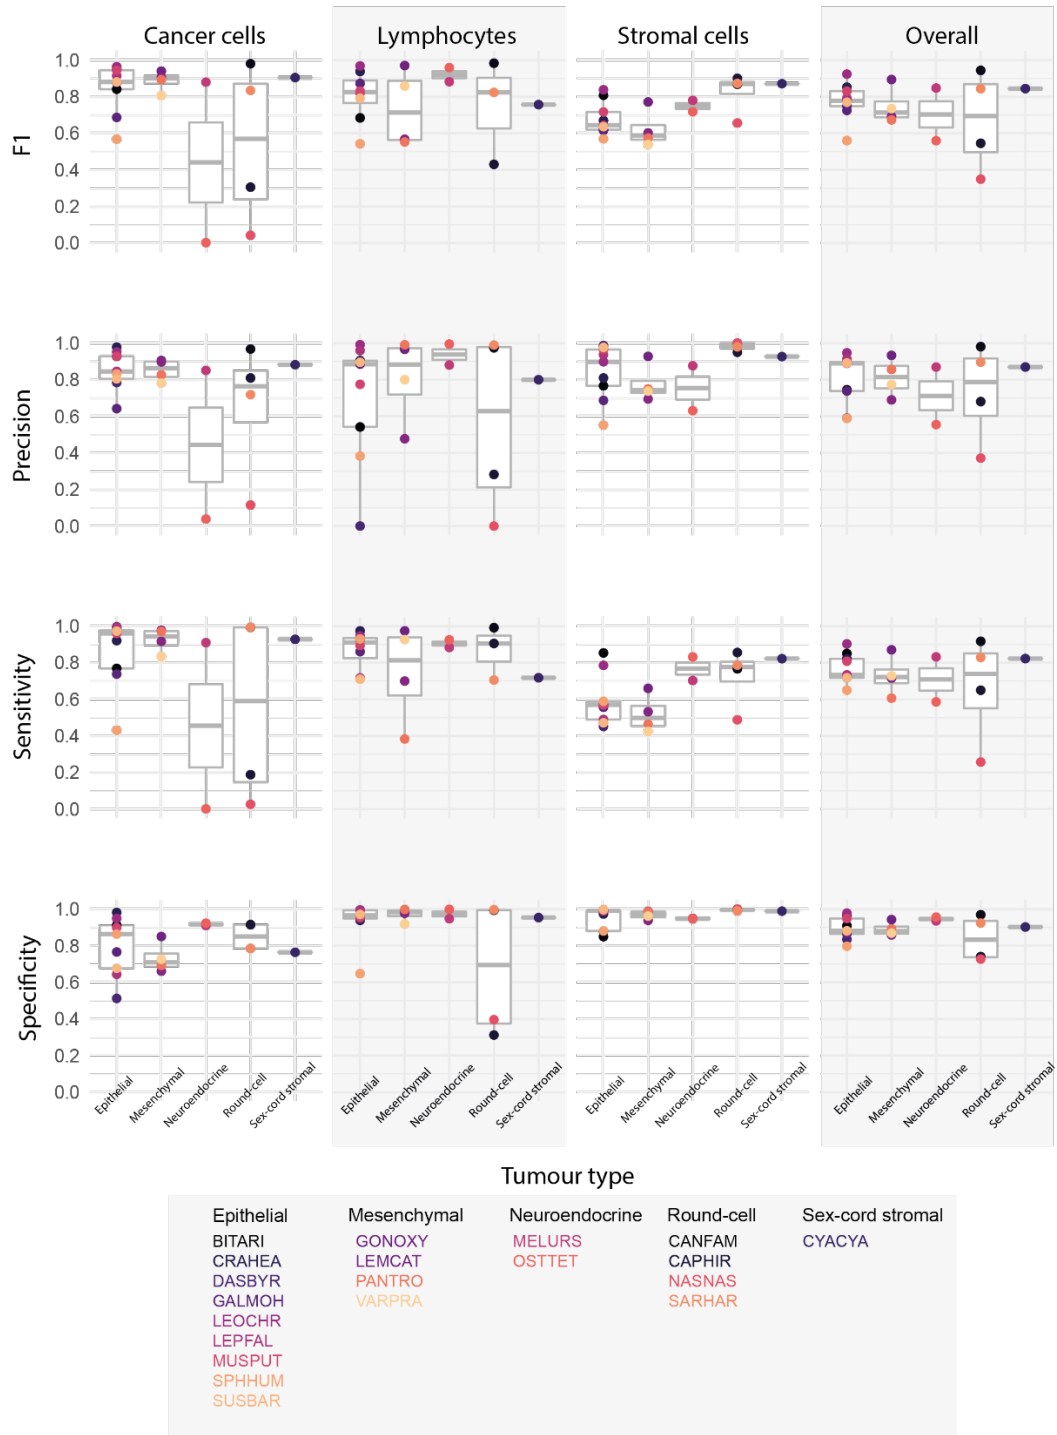

**Supplementary Figure 2 Extended AI prediction variability for inter and intra-species tumour microenvironment cells.** For each species, four metrics were evaluated including F1, precision, sensitivity, and specificity (rows) for the prediction accuracy of cancer, lymphocytes, and stromal cells as well as their average shown as 'overall' (columns). Species are grouped according to their tumour type and are labelled with their codes, for more species information, see Table 1. For the number of cells annotated per cell class for each species, see supplementary table 2. Center line in boxplots indicates median value; box limits are upper and lower quartiles; whiskers indicate minimum and maximum values.

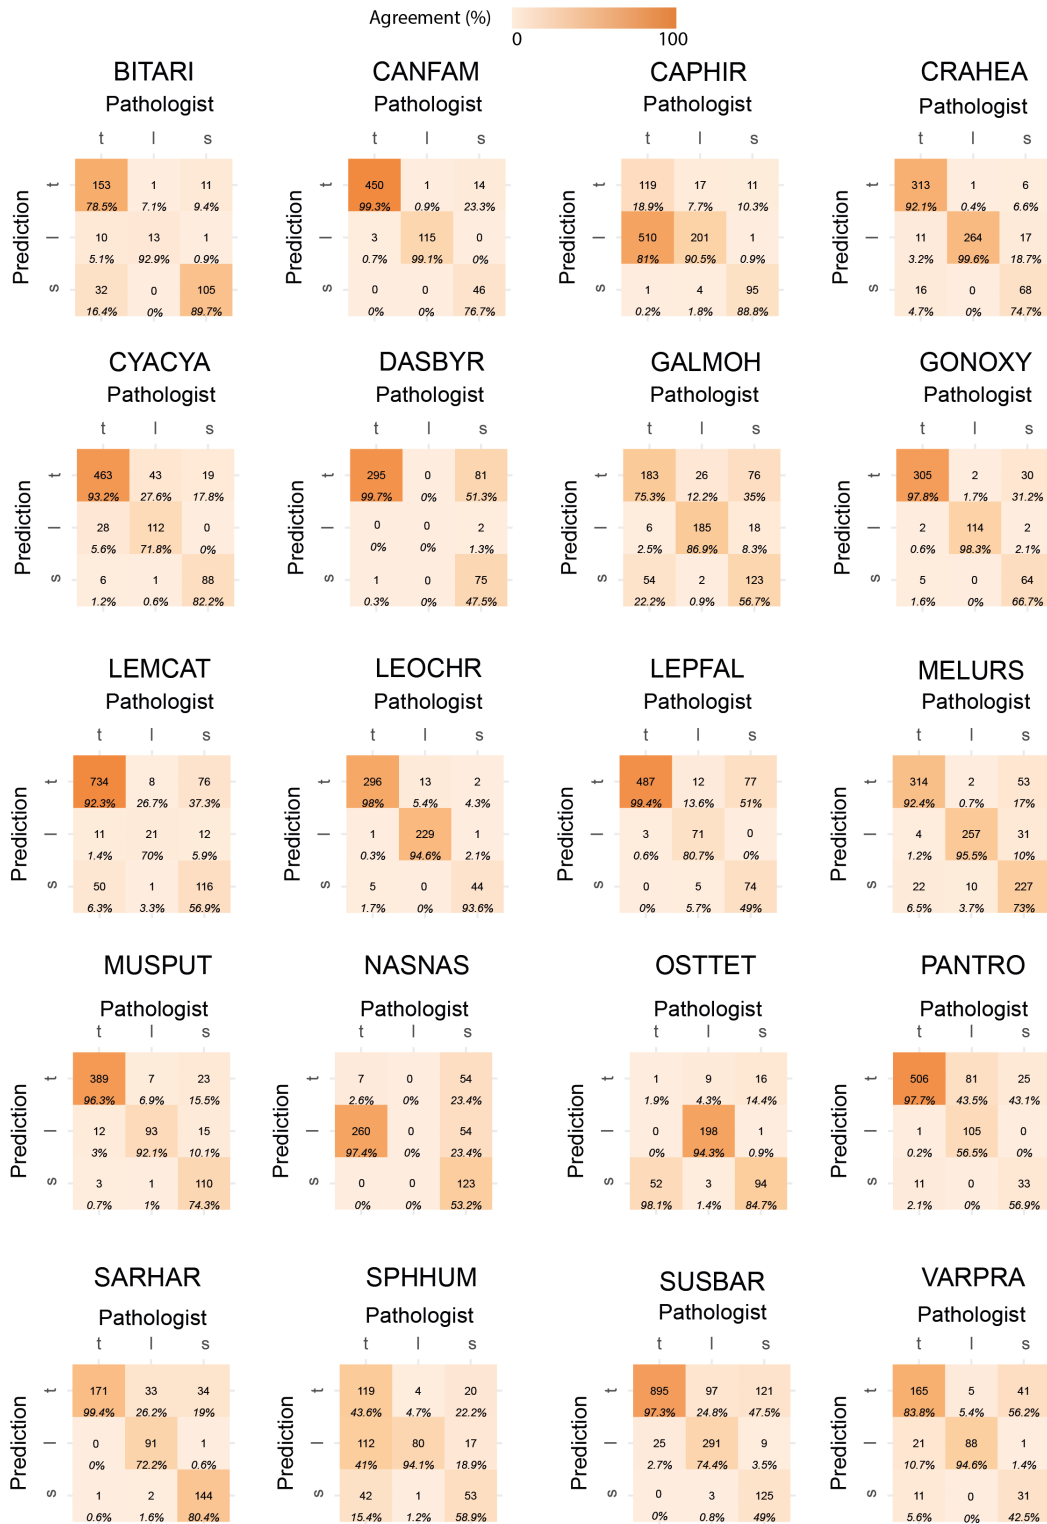

**Supplementary Figure 3 Confusion matrices of cell classification.** An individual confusion matrix for each sample/species depicts the relationship between pathologist annotations and AI predictions of single-cell classes: lymphocytes (l), stromal cells (s), and tumour cells (t). Each cell in the matrix contains the number of cells for each intersection and the percentage of the pathologist's annotations for each class predicted in different classes by the AI. Colour intensity indicates highest agreement between prediction and pathologist annotations.

**Supplementary Table 1** Performance of classification. AUCROC values for each cell class corresponding to each tissue/species. Value between brackets (n) indicates the number pathologists' annotations for each cell class/species.

| Species code | Scientific name                   | Diagnosis                     | Lymphocytes | Tumour cells | Stromal cells | Mean  |
|--------------|-----------------------------------|-------------------------------|-------------|--------------|---------------|-------|
| BITARI       | <i>Bitis arietans</i>             | Carcinoma                     | 0.947 (14)  | 0.847 (199)  | 0.872 (123)   | 0.888 |
| CANFAM       | <i>Canis familiaris</i>           | CTVT                          | 0.993 (116) | 0.954 (453)  | 0.883 (60)    | 0.943 |
| CAPHIR       | <i>Capra hircus</i>               | Lymphoma                      | 0.606 (222) | 0.552 (632)  | 0.941 (111)   | 0.700 |
| CRAHEA       | <i>Crateromys heaneyi</i>         | Hepatocellular carcinoma      | 0.966 (271) | 0.95 (340)   | 0.86 (119)    | 0.925 |
| CYACYA       | <i>Cyanerpes cyaneus</i>          | Sertoli cell tumor            | 0.836 (156) | 0.848 (499)  | 0.906 (107)   | 0.863 |
| DASBYR       | <i>Dasyuroides byrnie</i>         | Squamous cell carcinoma       | -           | 0.742 (296)  | 0.736 (166)   | 0.739 |
| GALMOH       | <i>Galago moholi</i>              | Squamous cell carcinoma       | 0.908 (215) | 0.758 (248)  | 0.722 (221)   | 0.796 |
| GONOXY       | <i>Gonyosoma oxycephala</i>       | Metastatic anaplastic sarcoma | 0.986 (117) | 0.913 (312)  | 0.827 (97)    | 0.909 |
| LEMCAT       | <i>Lemur catta</i>                | Haemangiosarcoma              | 0.838 (30)  | 0.782 (801)  | 0.753 (218)   | 0.791 |
| LEOCHR       | <i>Leontopithecus chrysomelas</i> | Adenoma                       | 0.97 (242)  | 0.959 (303)  | 0.964 (56)    | 0.964 |
| LEPFAL       | <i>Leptodactylus fallax</i>       | Adenocarcinoma                | 0.901 (99)  | 0.811 (490)  | 0.741 (151)   | 0.818 |
| MELURS       | <i>Melursus ursinus inornatus</i> | Pheochromocytoma              | 0.949 (291) | 0.915 (345)  | 0.839 (323)   | 0.901 |
| MUSPUT       | <i>Mustela putorius furo</i>      | Sebaceous epithelioma         | 0.936 (104) | 0.921 (405)  | 0.868 (193)   | 0.908 |
| NASNAS       | <i>Nasua nasua</i>                | Lymphoma                      | -           | 0.396 (268)  | 0.766 (252)   | 0.581 |
| OSTTET       | <i>Osteolaemus t. tetraspis</i>   | Lipoma                        | 0.968 (214) | 0.47 (815)   | 0.819 (113)   | 0.753 |
| PANTRO       | <i>Pan troglodytes</i>            | Spindle cell tumor            | 0.781 (274) | 0.771 (521)  | 0.777 (71)    | 0.776 |
| SARHAR       | <i>Sarcophilus harrisii</i>       | Devil facial tumor 1 (DFT1)   | 0.86 (129)  | 0.887 (172)  | 0.897 (183)   | 0.881 |
| SPHHUM       | <i>Spheniscus</i>                 | Renal cell adenoma            | 0.793 (86)  | 0.649 (276)  | 0.734 (90)    | 0.726 |

|        |                         |                      |             |             |             |       |
|--------|-------------------------|----------------------|-------------|-------------|-------------|-------|
|        | <i>humboldti</i>        |                      |             |             |             |       |
| SUSBAR | <i>Sus barbatus</i>     | Adenocarcinoma       | 0.858 (410) | 0.818 (920) | 0.744 (265) | 0.806 |
| VARPRA | <i>Varanus prasinus</i> | Spindle cell sarcoma | 0.932 (95)  | 0.78 (198)  | 0.693 (73)  | 0.802 |
|        |                         | mean                 | 0.891       | 0.786       | 0.817       |       |

**Supplementary Table 2** Performance of AI human-lung model on canine prostate carcinoma cohort based on 26,997 pathologist annotations.

|                                |                      |             |               |
|--------------------------------|----------------------|-------------|---------------|
| Overall performance            |                      |             |               |
| Accuracy (95% CI)              | 0.877 (0.873, 0.881) |             |               |
| Mean balanced accuracy (BCAcc) | 0.9                  |             |               |
| Kappa                          | 0.7978               |             |               |
| Class-specific performance     |                      |             |               |
|                                | Tumour cells         | Lymphocytes | Stromal cells |
| Sensitivity                    | 0.866                | 0.911       | 0.815         |
| Specificity                    | 0.899                | 0.982       | 0.930         |
| Balanced Accuracy              | 0.883                | 0.947       | 0.872         |
| Precision                      | 0.892                | 0.969       | 0.635         |
| F1                             | 0.879                | 0.939       | 0.714         |
| AUROC                          | 0.875                | 0.936       | 0.872         |

**Supplementary Table 3** Performance comparison between the AI human-lung and canine-prostate models in predicting cell classes of cohort 0. Values correspond to the average balanced accuracy across the three classes (Lymphocytes, Tumour cells, Stromal cells)

| Species code | Scientific name                   | Diagnosis                           | Neoplasia site             | Tumour type      | Balanced Accuracy |           |
|--------------|-----------------------------------|-------------------------------------|----------------------------|------------------|-------------------|-----------|
|              |                                   |                                     |                            |                  | Lung model        | Dog model |
| BITARI       | <i>Bitis arietans</i>             | Carcinoma                           | Pancreas                   | Epithelial       | 0.88              | 0.535     |
| CANFAM       | <i>Canis familiaris</i>           | Canine transmissible venereal tumor | Intra vaginal              | Round-cell       | 0.94              | 0.533     |
| CAPHIR       | <i>Capra hircus</i>               | Lymphoma                            | Forestomach                | Round-cell       | 0.70              | 0.534     |
| CRAHEA       | <i>Crateromys heaneyi</i>         | Hepatocellular carcinoma            | Liver                      | Epithelial       | 0.89              | 0.714     |
| CYACYA       | <i>Cyanerpes cyaneus</i>          | Sertoli cell tumor                  | Testis                     | Sex-cord stromal | 0.86              | 0.496     |
| DASBYR       | <i>Dasyuroides byrnie</i>         | Squamous cell carcinoma             | Mouth                      | Epithelial       | 0.74              | 0.617     |
| GALMOH       | <i>Galago moholi</i>              | Squamous cell carcinoma             | Skin                       | Epithelial       | 0.79              | 0.728     |
| GONOXY       | <i>Gonyosoma oxycephala</i>       | Metastatic anaplastic sarcoma       | Multiple                   | Mesenchymal      | 0.91              | 0.586     |
| LEMCAT       | <i>Lemur catta</i>                | Haemangiosarcoma                    | Kidney                     | Mesenchymal      | 0.79              | 0.728     |
| LEOCHR       | <i>Leontopithecus chrysomelas</i> | Adenoma                             | Pituitary                  | Epithelial       | 0.94              | 0.68      |
| LEPFAL       | <i>Leptodactylus fallax</i>       | Adenocarcinoma                      | Celomic cavity             | Epithelial       | 0.81              | 0.587     |
| MELURS       | <i>Melursus u. inornatus</i>      | Pheochromocytoma                    | Adrenal                    | Neuroendocrine   | 0.88              | 0.581     |
| MUSPUT       | <i>Mustela putorius furo</i>      | Sebaceous epithelioma               | Skin                       | Epithelial       | 0.88              | 0.698     |
| NASNAS       | <i>Nasua nasua</i>                | Lymphoma                            | Multiple                   | Round-cell       | 0.57              | 0.461     |
| OSTTET       | <i>Osteolaemus t. tetraspis</i>   | Lipoma                              | Liver                      | Neuroendocrine   | 0.77              | 0.797     |
| PANTRO       | <i>Pan troglodytes</i>            | Spindle cell tumor                  | Palate                     | Mesenchymal      | 0.75              | 0.738     |
| SARHAR       | <i>Sarcophilus harrisii</i>       | Devil facial tumor 1 (DFT1)         | Hard palate near left side | Round-cell       | 0.88              | 0.559     |
| SPHHUM       | <i>Spheniscus humboldti</i>       | Renal cell adenoma                  | Kidney                     | Epithelial       | 0.72              | 0.503     |
| SUSBAR       | <i>Sus barbatus</i>               | Adenocarcinoma                      | Uterus                     | Epithelial       | 0.80              | 0.681     |



|        |                         |                      |          |             |      |       |
|--------|-------------------------|----------------------|----------|-------------|------|-------|
| VARPRA | <i>Varanus prasinus</i> | Spindle cell sarcoma | Multiple | Mesenchymal | 0.80 | 0.552 |
|--------|-------------------------|----------------------|----------|-------------|------|-------|

**Supplementary Table 4** The 27 single-cell features extracted to compute the morphological space.

| Feature         | Description                                                                                       |
|-----------------|---------------------------------------------------------------------------------------------------|
| Area            | Two-dimensional extension of a shape                                                              |
| MajorAxisLength | Longest diameter                                                                                  |
| MinorAxisLength | Shortest diameter                                                                                 |
| Eccentricity    | Magnitude inversely related to shape curvature                                                    |
| ConvexArea      | Area resulting from connecting the external points of the shape                                   |
| FilledArea      | Area of a corresponding image with holes filled in                                                |
| EquivDiameter   | Diameter of a circle with the same area as the region                                             |
| Solidity        | Extent to which the shape fills the convex area                                                   |
| Extent          | Ratio of pixels in the region to pixels in the total bounding box                                 |
| Perimeter       | Length of the shape boundary                                                                      |
| ConvexHullMean  | Smallest convex polygon that can contain the region                                               |
| FilledImageMean | Average of pixels corresponding to the segmented mask, with all holes filled                      |
| ConvexImageMean | Average of pixels corresponding to a segmented mask which specifies the convex hull of the region |
| Diameters       | Cell diameter using major and minor axes                                                          |
| Radii           | Cell radius                                                                                       |
| MeanIntensity_R | Mean pixel intensity in the red channel                                                           |
| MinIntensity_R  | Minimum pixel intensity in the red channel                                                        |
| MaxIntensity_R  | Maximum pixel intensity in the red channel                                                        |
| MeanIntensity_G | Mean pixel intensity in the green channel                                                         |
| MinIntensity_G  | Minimum pixel intensity in the green channel                                                      |

|                  |                                               |
|------------------|-----------------------------------------------|
| MaxIntensity_G   | Maximum pixel intensity in the green channel  |
| MeanIntensity_B  | Mean pixel intensity in the blue channel      |
| MinIntensity_B   | Minimum pixel intensity in the blue channel   |
| MaxIntensity_B   | Maximum pixel intensity in the blue channel   |
| RGBMeanIntensity | Mean pixel intensity in the composed image    |
| RGBMinIntensity  | Minimum pixel intensity in the composed image |
| RGBMaxIntensity  | Maximum pixel intensity in the composed image |

**Supplementary Table 5** Morphological overlap for each species of the cohort 0 with other cell classes. Each column has the ratio of the morphospace for the focal cell class overlapped with another cell class. Prefix *a-* and *h-* means non-human and human cell classes, respectively. *tum* refers to tumour cells and *lymp* to lymphocytes.

| Species code | a- tumour/<br>h- tumour | a-tumour/ h-<br>lymphocyte | a- tumour /<br>a-<br>lymphocyte | a-<br>lymphocyte/<br>h- tumour | a-<br>lymphocyte/<br>h-lymp | a-<br>lymphocyte/<br>a- tumour |
|--------------|-------------------------|----------------------------|---------------------------------|--------------------------------|-----------------------------|--------------------------------|
| BITARI       | 0.703                   | 0.362                      | 0.101                           | 0.291                          | 0.883                       | 0.340                          |
| CANFAM       | 0.807                   | 0.108                      | 0.013                           | 0.189                          | 0.933                       | 0.034                          |
| CAPHIR       | 0.243                   | 0.848                      | 0.355                           | 0.171                          | 0.851                       | 0.938                          |
| CRAHEA       | 0.514                   | 0.046                      | 0.004                           | 0.200                          | 0.925                       | 0.006                          |
| CYACYA       | 0.668                   | 0.384                      | 0.247                           | 0.223                          | 0.819                       | 0.233                          |
| DASBYR       | 0.513                   | 0.068                      | -                               | -                              | -                           | -                              |
| GALMOH       | 0.431                   | 0.217                      | 0.069                           | 0.172                          | 0.780                       | 0.282                          |
| GONOXY       | 0.914                   | 0.244                      | 0.170                           | 0.212                          | 0.718                       | 0.243                          |
| LEMCAT       | 0.691                   | 0.094                      | 0.017                           | 0.306                          | 0.911                       | 0.052                          |
| LEOCHR       | 0.737                   | 0.228                      | 0.031                           | 0.128                          | 0.538                       | 0.163                          |
| LEPFAL       | 0.561                   | 0.306                      | 0.039                           | 0.234                          | 0.913                       | 0.624                          |
| MELURS       | 0.491                   | 0.132                      | 0.020                           | 0.166                          | 0.854                       | 0.042                          |
| MUSPUT       | 0.413                   | 0.461                      | 0.098                           | 0.156                          | 0.782                       | 0.434                          |
| NASNAS       | 0.144                   | 0.740                      | -                               | -                              | -                           | -                              |
| OSTTET       | 0.487                   | 0.443                      | 0.082                           | 0.175                          | 0.844                       | 0.464                          |
| PANTRO       | 0.483                   | 0.056                      | 0.070                           | 0.775                          | 0.252                       | 0.153                          |

|        |       |       |       |       |       |       |
|--------|-------|-------|-------|-------|-------|-------|
| SARHAR | 0.700 | 0.064 | 0.026 | 0.357 | 0.839 | 0.034 |
| SPHHUM | 0.439 | 0.651 | 0.169 | 0.149 | 0.481 | 0.122 |
| SUSBAR | 0.559 | 0.139 | 0.089 | 0.267 | 0.867 | 0.156 |
| VARPRA | 0.797 | 0.272 | 0.049 | 0.161 | 0.729 | 0.103 |

**Supplementary Table 6** Summary of sample preparation methods as provided from the Zoological Society of London's pathological archive.

| Case ID   | Species code | Pathologists | Method                                                                               |
|-----------|--------------|--------------|--------------------------------------------------------------------------------------|
| B01/17    | MUSPUT       | IZVG/RVC- DD | Biopsy: removed during surgery and formalin-fixed                                    |
| B02/18    | GALMOH       | IZVG/RVC- DD | Biopsy: removed during surgery and formalin-fixed                                    |
| B04/17    | LEMCAT       | IZVG/RVC- MS | Biopsy: removed during surgery and formalin-fixed                                    |
| B07-8/04  | PANTRO       | ZSL- AP      | Biopsy - removed during surgery and formalin-fixed                                   |
| B09/04    | DASBYR       | ZSL- AP      | Biopsy - removed during surgery and formalin-fixed                                   |
| W17M035   | MELURS       | IZVG/RVC- MS | Euthanasia: Carcass fresh – PM examination one day after death                       |
| W17R187   | OSTTET       | IZVG/RVC- DD | Natural death: Carcass fresh - PM on day of death                                    |
| ZA1360/15 | LEPFAL       | IZVG/RVC- MS | Natural death: Carcass slightly autolysed – PM on day of death                       |
| ZB017/18  | CYACYA       | IZVG/RVC- MS | Euthanasia: Carcass fresh – PM examination one day after death                       |
| ZB485/19  | SPHHUM       | IZVG/RVC- CS | Euthanasia: No comment on carcass condition - PM carried out 2 days after euthanasia |
| ZM134/17  | CAPHIR       | IZVG/RVC- CS | Carcass fresh – euthanised and PM'd on day of death                                  |
| ZM138/17  | SUSBAR       | IZVG/RVC- MS | Carcass fresh - PM on day of death                                                   |
| ZM203/17  | LEOCHR       | IZVG/RVC- MS | Carcass fresh - PM on day of death                                                   |
| ZM633/18  | CRAHEA       | IZVG/RVC- DD | Euthanasia: Carcass fresh – PM examination one day after death                       |
| ZM748/18  | NASNAS       | IZVG/RVC- CS | Euthanasia: Carcass fresh – PM examination one day after death                       |
| ZR1145/15 | GONXY        | IZVG/RVC- MS | Euthanasia: Carcass fresh - kept in fridge two days before examination               |
| ZR1148/18 | VARPRA       | IZVG/RVC- DD | Euthanasia: Carcass fresh – PM examination one day after death                       |
| ZR474/19  | BITARI       | IZVG/RVC- CS | Euthanasia: Carcass fresh – PM examination one day after death                       |
